# Supplementary material
Source: PubMed Central journal article supplement (PMC7124227)
Supplement: mmc1.pdf [file mmc1.pdf]

Community-acquired Hospital-acquired

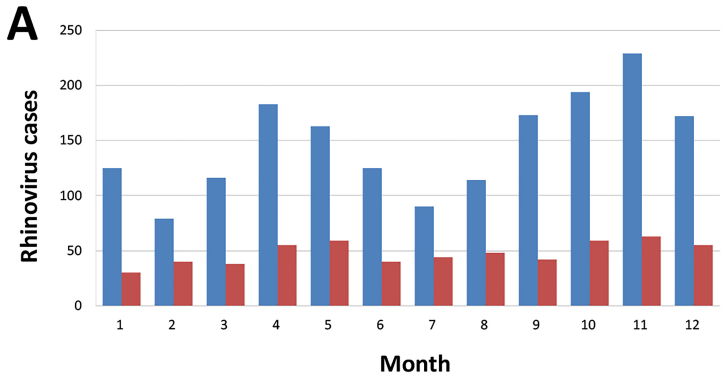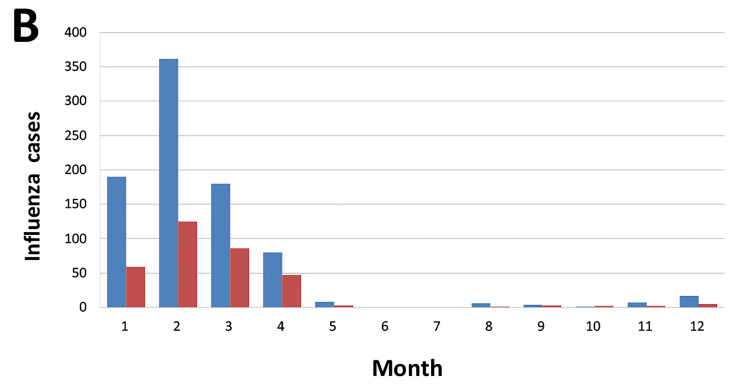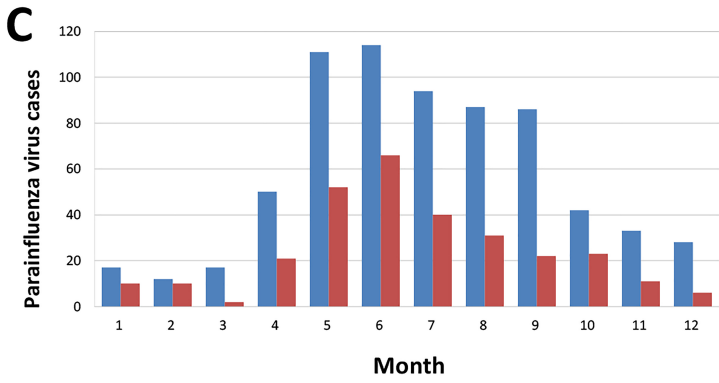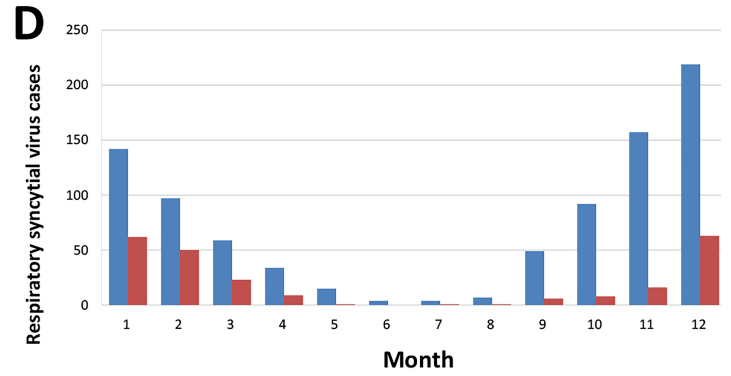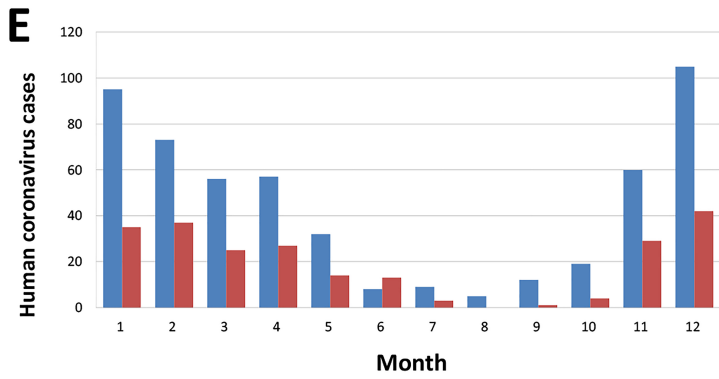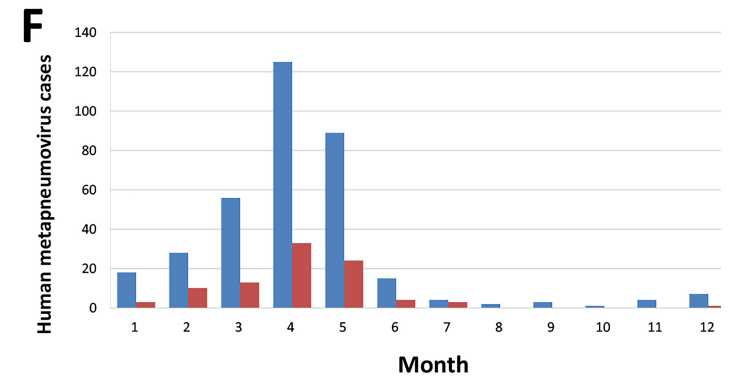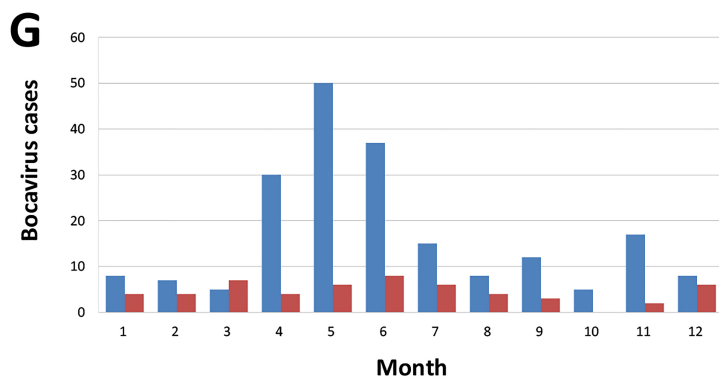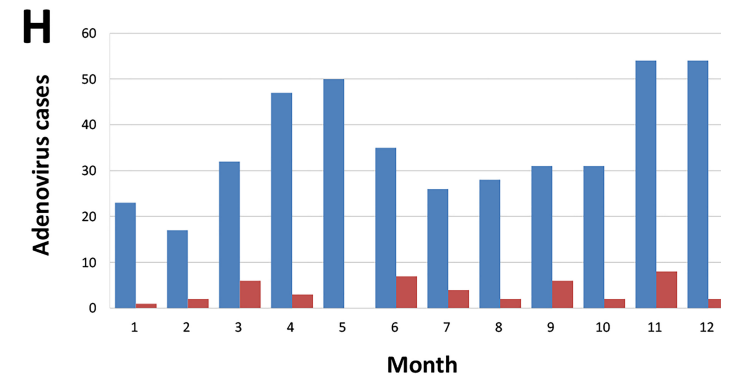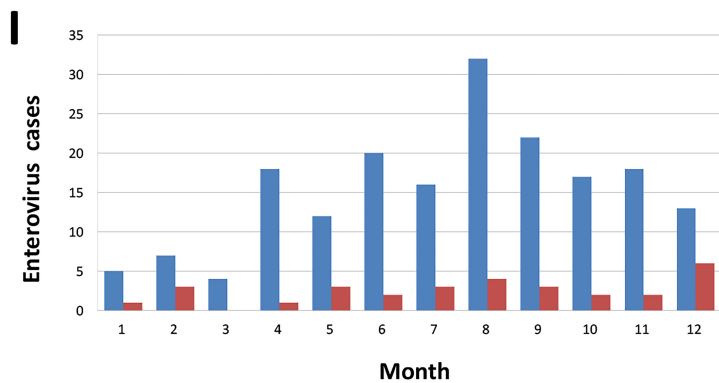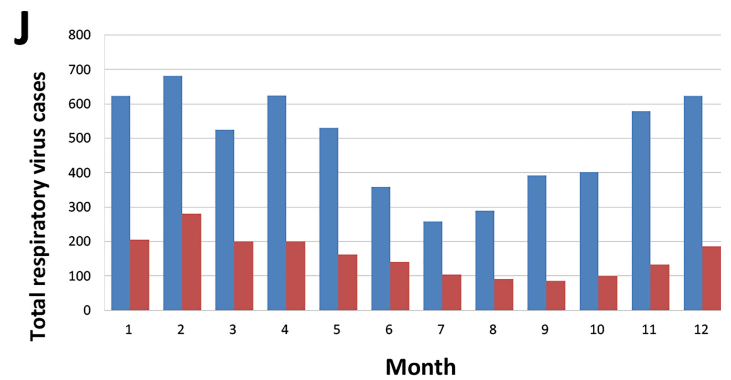

## FIGURE LEGENDS

**Supplementary Figure 1.** The seasonal distribution of hospital-acquired respiratory viruses among hospitalized patients was similar to that of community-acquired infection. (A) Rhinovirus, (B) Influenza virus, (C) Parainfluenza virus, (D) Respiratory syncytial virus, (E) Human coronavirus OC43/HKU-1 or 229E/NL63, (F) Human metapneumovirus, (G) Bocavirus, (H) Adenovirus, (I) Enterovirus, (J) Total respiratory virus
